# Supplementary material for: Identification and characterization of four Drosophila suzukii cellularization genes and their promoters
Source: PubMed Central journal article supplement (PMC7747377; doi:10.1186/s12863-020-00939-y), 2020-12-18
Supplement: 12863_2020_939_MOESM1_ESM.pdf [file 12863_2020_939_MOESM1_ESM.pdf]

## Additional file 1. Primer sequences

| Primer | Primer name          | Primer sequence (5'→3')              |
|--------|----------------------|--------------------------------------|
| P1     | Dssry-a_P_F          | CACCACCTGTTCCTGTAGC                  |
| P2     | Dssry-a_P_R          | GAAGTTATCGAGCTCAGGC                  |
| P3     | Dsnullo_P_F          | AGTTCTTTGCCTGTATTTTCAGGAACTC         |
| P4     | Dsnullo_P_R          | TGCGATCAGGTCACTGCAAG                 |
| P5     | Dsbnk_P_F            | GCTCACAGGGAATGGATTCAGAG              |
| P6     | Dsbnk_P_R            | TGGTCGAGTCCTCTCCGCTC                 |
| P7     | Dsslam_P_F           | AAGGAGGTGGAGCAATGAGAC                |
| P8     | Dsslam_P_R           | TCAGCTTGTAGTTGTAGAACTGGAAG           |
| P462   | Bsu_Dssry-a_P_F      | ACGTACCCTGAGGAGTTCTTTGCCTGTATTTTCAGG |
| P463   | Mlu_Dssry-a_P_R      | ACGTACACGCGTAGCTCTATAAGATGTGCTCCCGG  |
| P464   | Bsu_Dsnullo_P_F      | ACGTACCCTGAGGGATGCTCTTTTAGGAATTTATC  |
| P465   | Mlu_Dsnullo_P_R      | ACGTACACGCGTTTTTCTCAAACTTAGGTT       |
| P466   | Bsu_Dsbnk_P_F        | ACGTACCCTGAGGTAGAATCTGCATGCCTAATC    |
| P467   | Mlu_Dsbnk_P_R        | ACGTACACGCGTTTTAAGACCACTCTTTTTCTG    |
| P468   | Bsu_Dsslam_P_F       | ACGTACCCTGAGGAGGAGGTGGAGCAATGAG      |
| P469   | Mlu_Dsslam_P_R       | ACGTACACGCGTGTGAAGGCTGATAAACGA       |
| P1370  | Dzbnk-ORF-F          | ATGAGCATCAGCACTTTCAACTTCCAG          |
| P1371  | Dzbnk-ORF-R          | TTAGGCACTCATTGAGATGCGTTGC            |
| P1372  | Dznullo-ORF-F        | ATGGGCAGCACTCATTCCGCTG               |
| P1373  | Dznullo-ORF-R        | CTAGATCTTACCAGTCGTTCCGG              |
| P1374  | Dzslam-ORF-F1        | ATGGTTGTAAACACCGCAGCCATG             |
| P1375  | Dzslam-ORF-R1        | CTATACCTCCACGGCCCTTCGG               |
| P1348  | Dzslam-ORF-F2        | GCTGCAAGCCATCCGAAGC                  |
| P1223  | Dzslam-ORF-R2        | GCGTCTCGGGCTGAGATTCGTCGC             |
| P712   | Dz-GADPH-qF          | GATCACCGTCTTCAGCGAAC                 |
| P713   | Dz-GADPH-qR          | GGCACCGCCCTTCAAGTG                   |
| P738   | Dz- $\alpha$ -tub-qF | AGGATGCGGCGAATAACT                   |
| P739   | Dz- $\alpha$ -tub-qR | CGGTGGATAGTCGCTCAA                   |
| P740   | Dz-TBP-qF            | CCACGGTGAATCTGTGCT                   |
| P741   | Dz-TBP-qR            | GGAGTCGTCCTCGCTCTT                   |
| P1234  | Dz-AK-qF             | ACGGTGAACCCAATGGCACCGC               |
| P1235  | Dz-AK-qR             | CAACAGCGACTTGGAGTCGGAGGC             |
| P1360  | Ds_His3_qF           | GAACGGTTGCCCTGCGTG                   |
| P1361  | Ds_His3_qR           | AGCTCTGGAATCGCAGGTCAG                |
| P1562  | Dz_slam_qF           | CACGCTGCAGATATCAAGGC                 |
| P1563  | Dz_slam_qR           | GGATACTTTGCCTCCAGTTCC                |
| P1543  | Dssrya_qF            | ATCGGACAAGATGGCTCTGAC                |
| P1544  | Dssrya_qR            | GCATGGCCTCGTTTAAGAAGGA               |
| P1547  | Dsnullo_qF           | GCTGAAAATGTGAAGAGCGGAG               |
| P1548  | Dsnullo_qR           | CTTTTGCTTCCTGGCCGAAATG               |
| P1551  | Dsbnk_qF             | CTGACCAACACCTTTGAGTCG                |
| P1552  | Dsbnk_qR             | AAAAGACTGTTTGCCACGCC                 |
